# Supplementary material for: Single-cell atlas of the first intra-mammalian developmental stage of the human parasite Schistosoma mansoni
Source: PubMed Central journal article supplement (PMC7749135; doi:10.1038/s41467-020-20092-5), 2020-12-18
Supplement: 41467_2020_20092_MOESM3_ESM.pdf [file 41467_2020_20092_MOESM3_ESM.pdf]

### **Description of Additional Supplementary Files**

File Name: Supplementary Data 1

Description: Sample manifest for the samples used in the study

File Name: Supplementary Data 2

Description: Seurat markers identified by "ROC" test

File Name: Supplementary Data 3

Description: Literature markers used to help identify schistosomula populations

File Name: Supplementary Data 4

Description: Cloning information for all markers used for validation

File Name: Supplementary Data 5

Description: Orthologous genes for *S. mediterranea* and *S. mansoni* used in the Random Forest Analysis

File Name: Supplementary Data 6

Description: Manually curated marker genes for representative populations between *S. mediterranea* (Plass, et al., 2018) and *S. mansoni*

File Name: Supplementary Data 7

Description: The number of independent in situ hybridization experiments performed
